# Supplementary material for: The case for prevention – Primary HIV prevention in the era of universal test and treat: A mathematical modeling study
Source: PubMed Central journal article supplement (PMC8924323; doi:10.1016/j.eclinm.2022.101347), 2022-03-14

# Goals Model

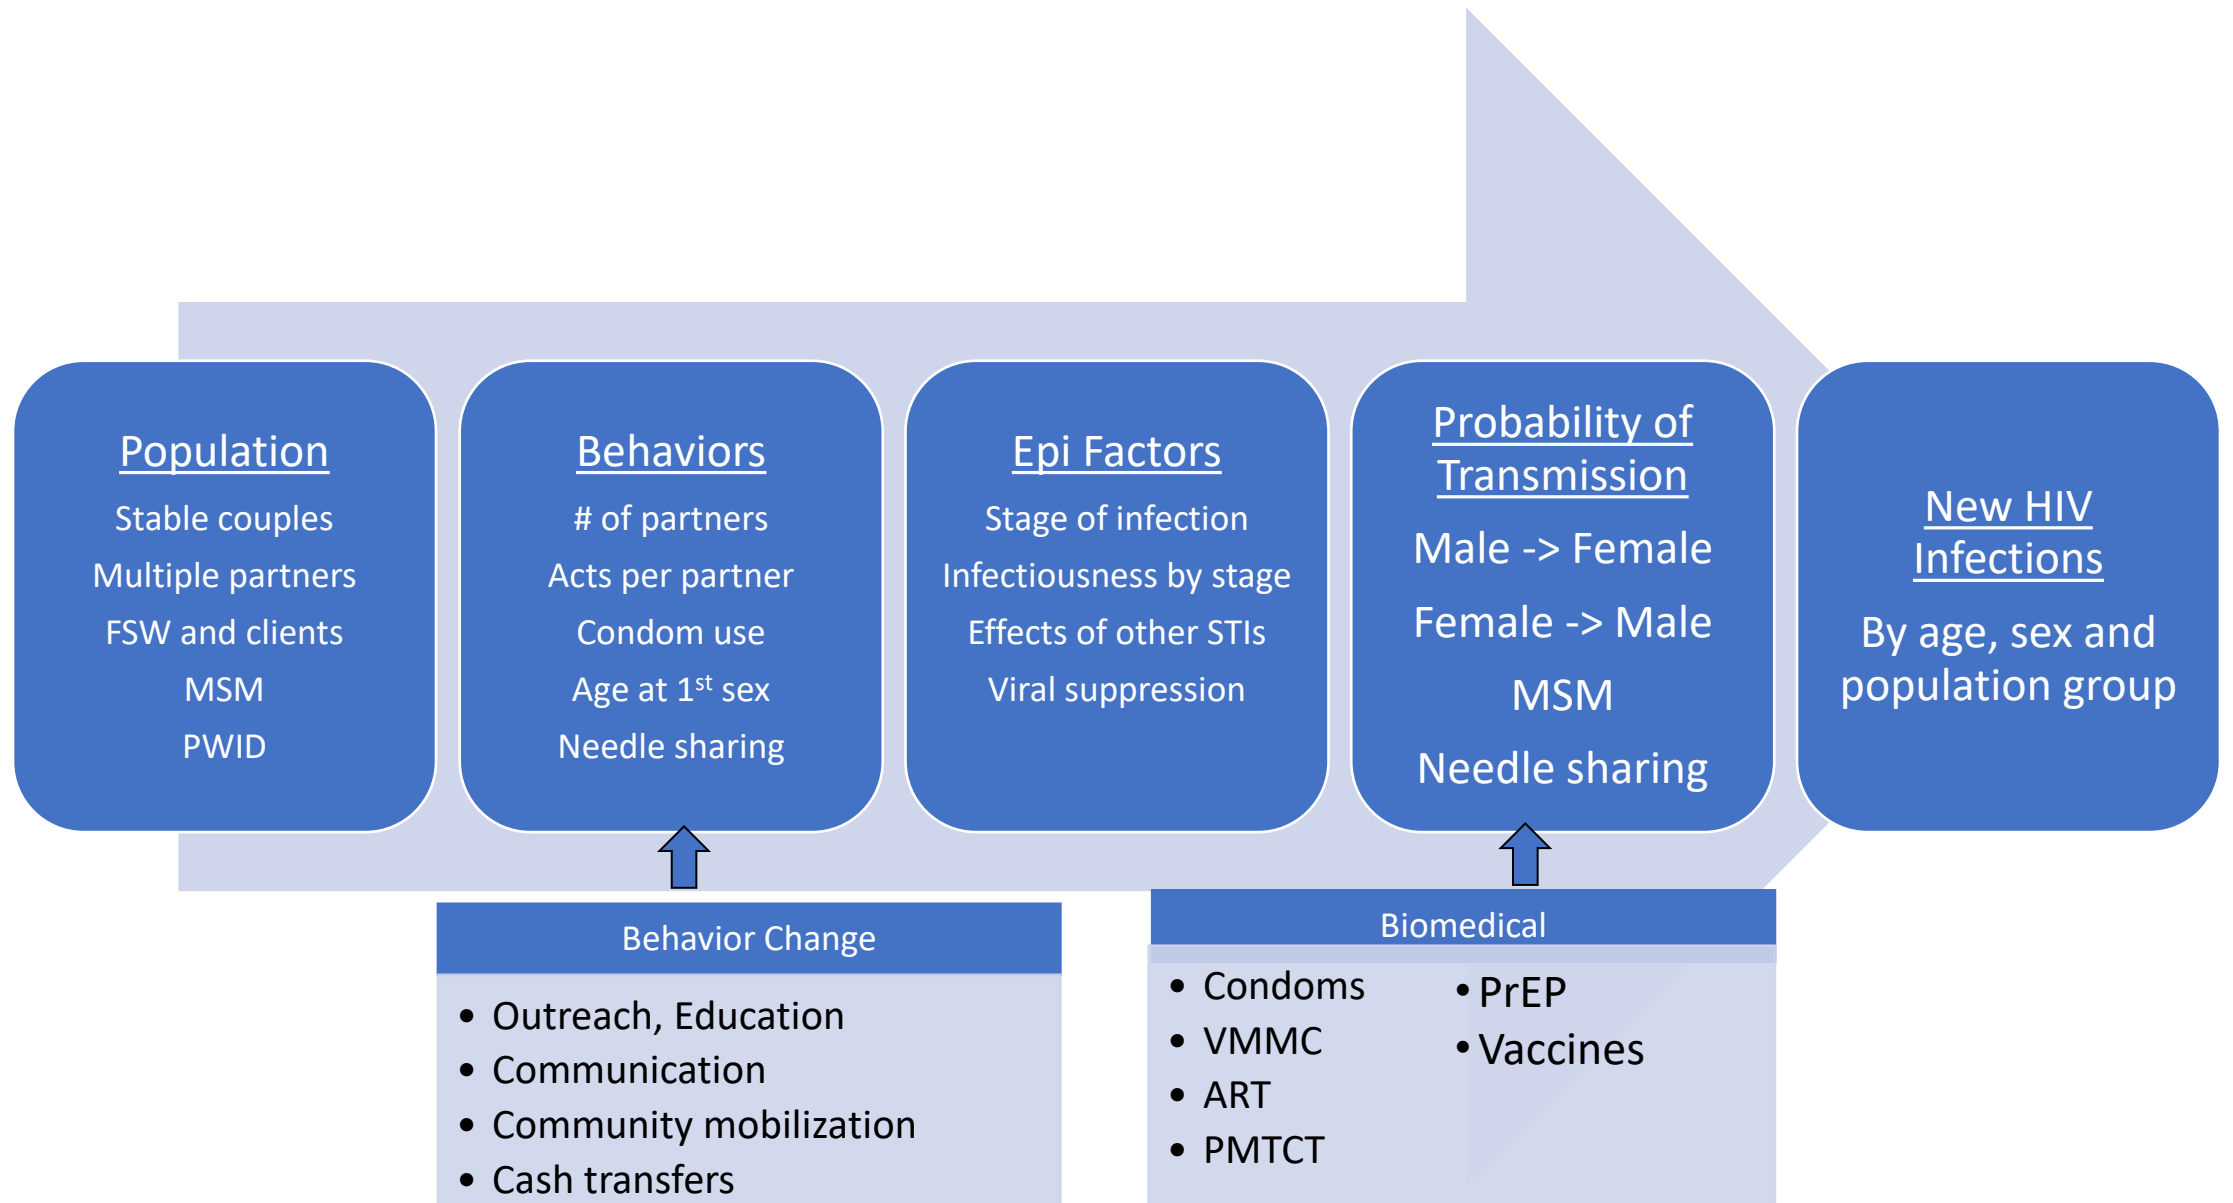

Supplement: mmc1.pdf [file mmc1.pdf]
