# Supplementary material for: The case for prevention – Primary HIV prevention in the era of universal test and treat: A mathematical modeling study
Source: PubMed Central journal article supplement (PMC8924323; doi:10.1016/j.eclinm.2022.101347), 2022-03-14

# Lesotho

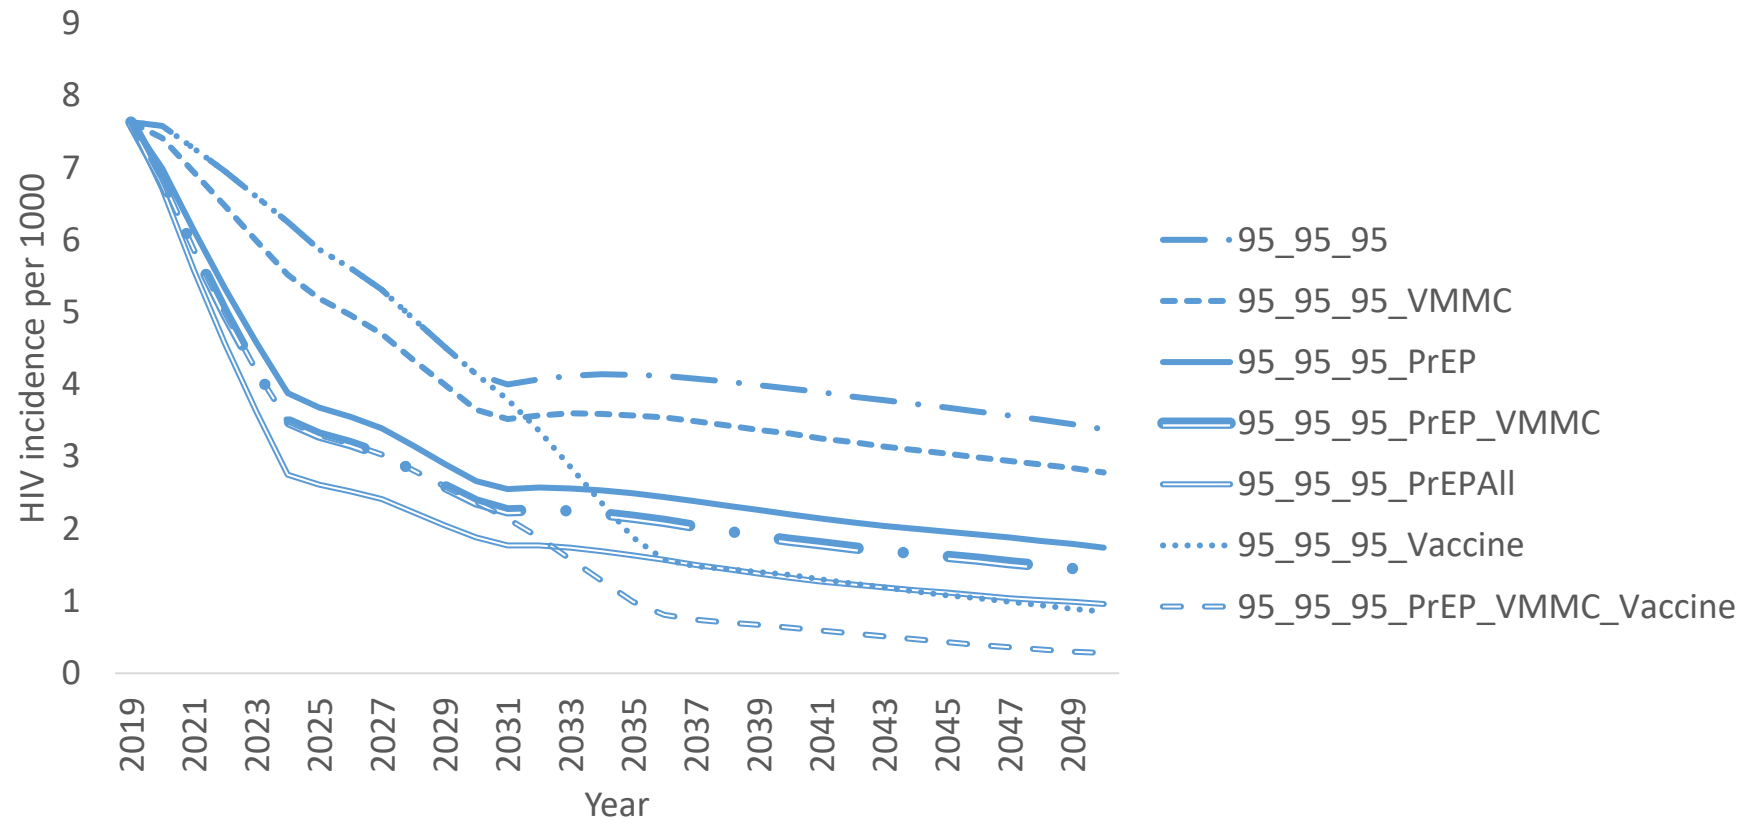

# Mozambique

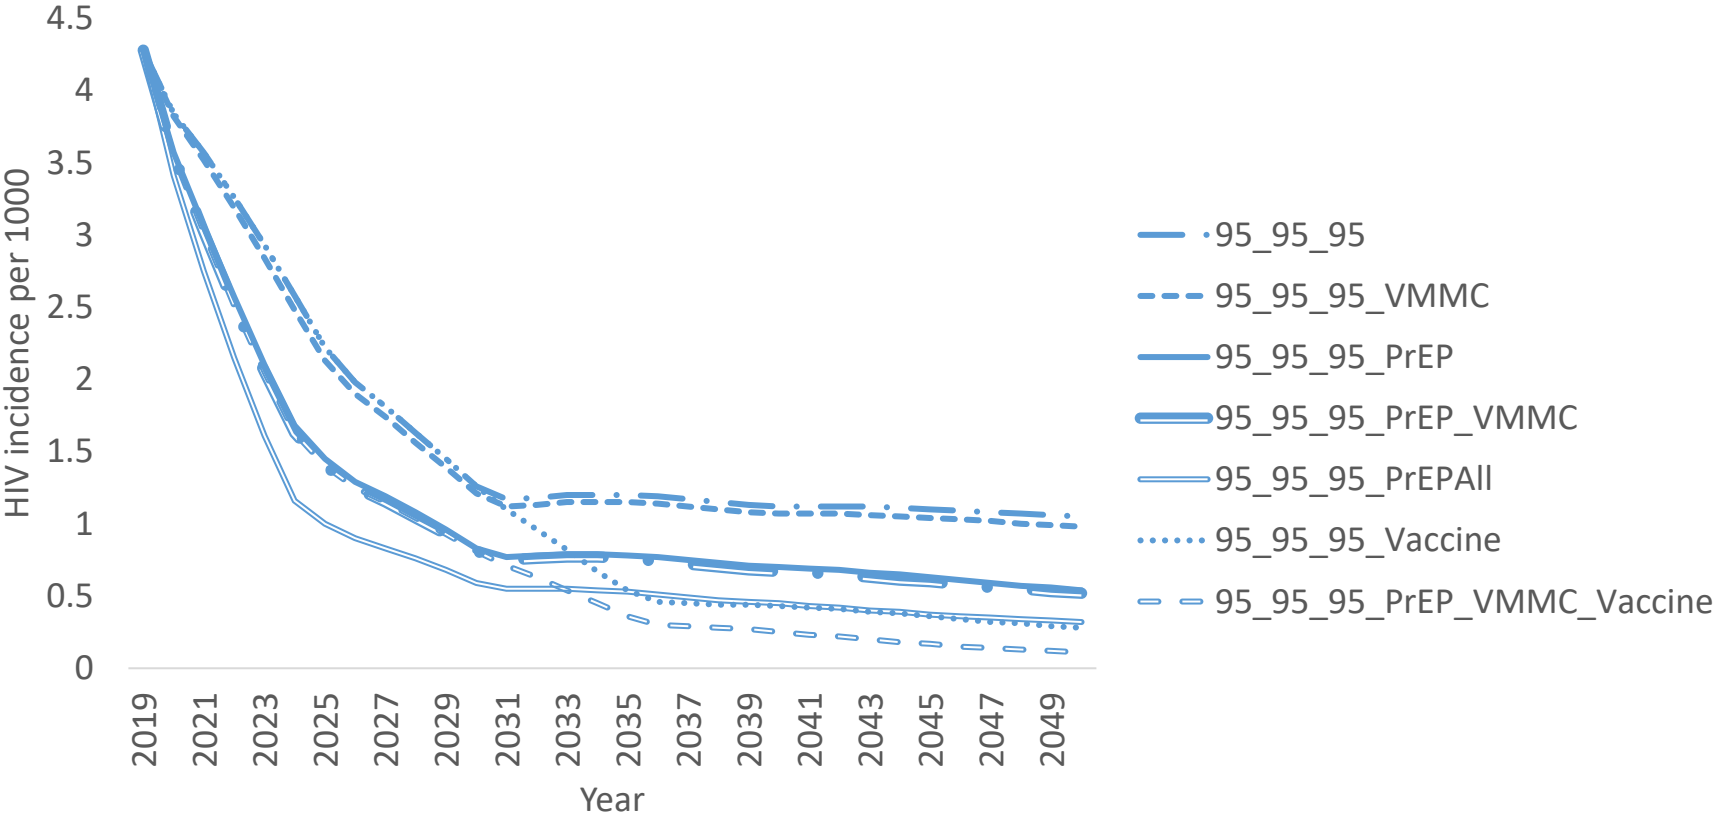

# Uganda

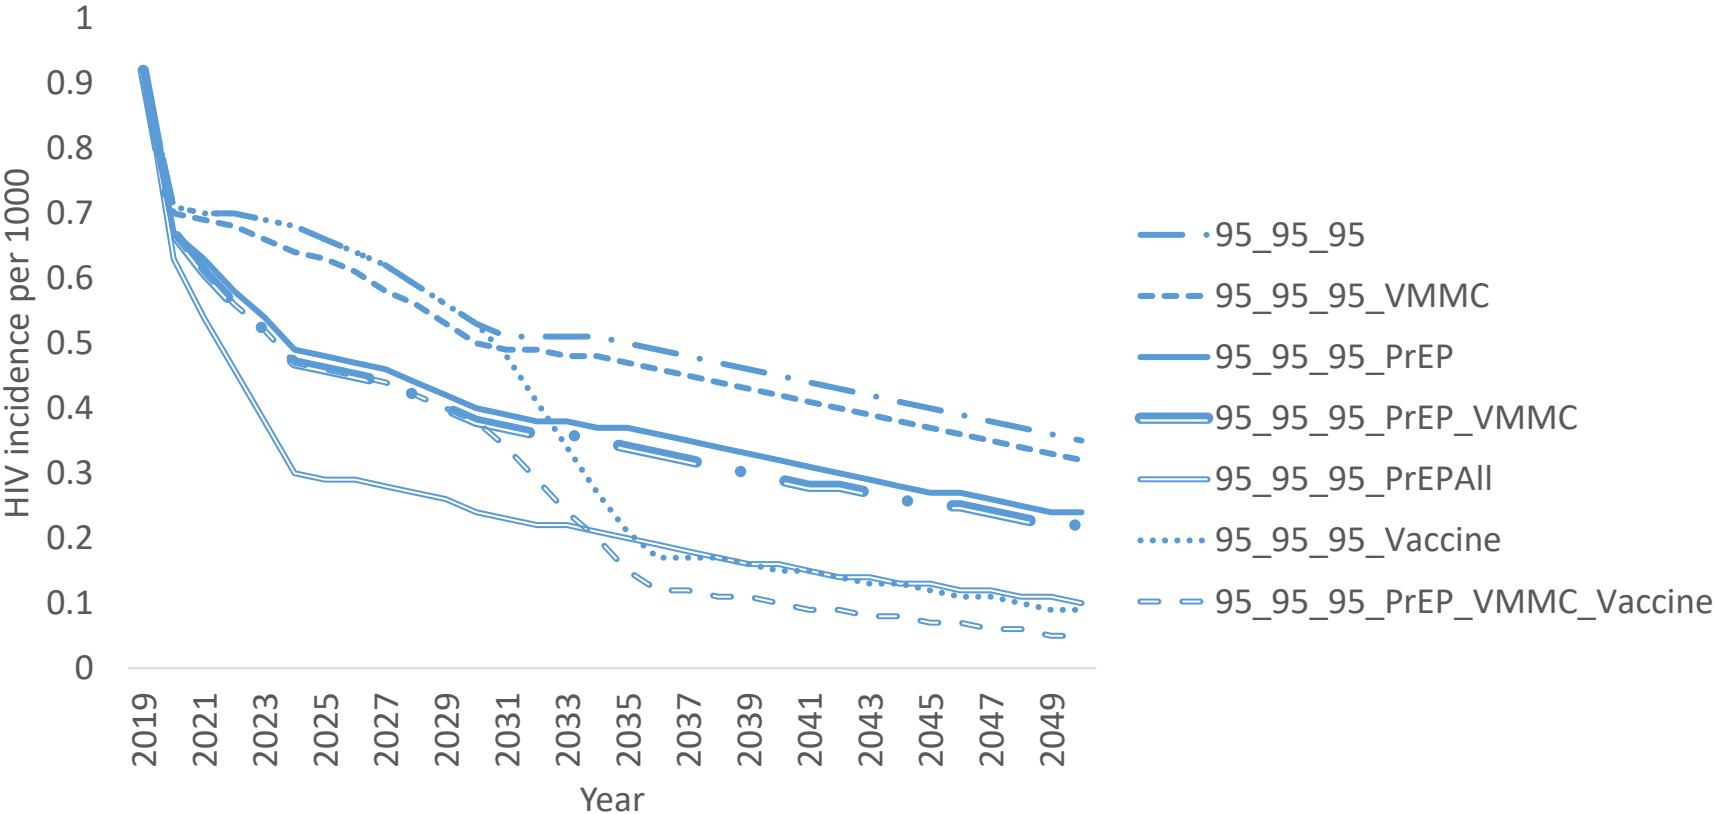

Supplement: mmc3.pdf [file mmc3.pdf]
